# Supplementary material for: Doxorubicin-Loaded Core–Shell UiO-66@SiO2 Metal–Organic Frameworks for Targeted Cellular Uptake and Cancer Treatment
Source: MDPI journal article supplement (doi:10.3390/pharmaceutics14071325), 2022-06-23
Supplement: s1 [file s1]

## **Supporting information**

for

### **Doxorubicin-loaded core-shell UiO-66@SiO<sub>2</sub> metal-organic frameworks for targeted cellular uptake and cancer treatment**

Daria B. Trushina<sup>1,2</sup>, Anastasia Yu. Sapach<sup>2,3</sup>, Olga Burachevskaya<sup>4</sup>, Pavel V. Medvedev<sup>4</sup>,  
Dmitry N. Khmelenin<sup>1</sup>, Tatiana N. Borodina<sup>1</sup>, Mikhail A. Soldatov<sup>4</sup>, Vera V. Butova<sup>4\*</sup>

<sup>1</sup> Federal Research Center Crystallography and Photonics, Russian Academy of Sciences, Moscow 119991 Russia

<sup>2</sup> Sechenov First State Medical University, Moscow 119991 Russia

<sup>3</sup> Skolkovo Institute of Science and Technology, Moscow 143025, Russia

<sup>4</sup> The Smart Materials Research Institute, Southern Federal University, Rostov-on-Don 344090, Russia

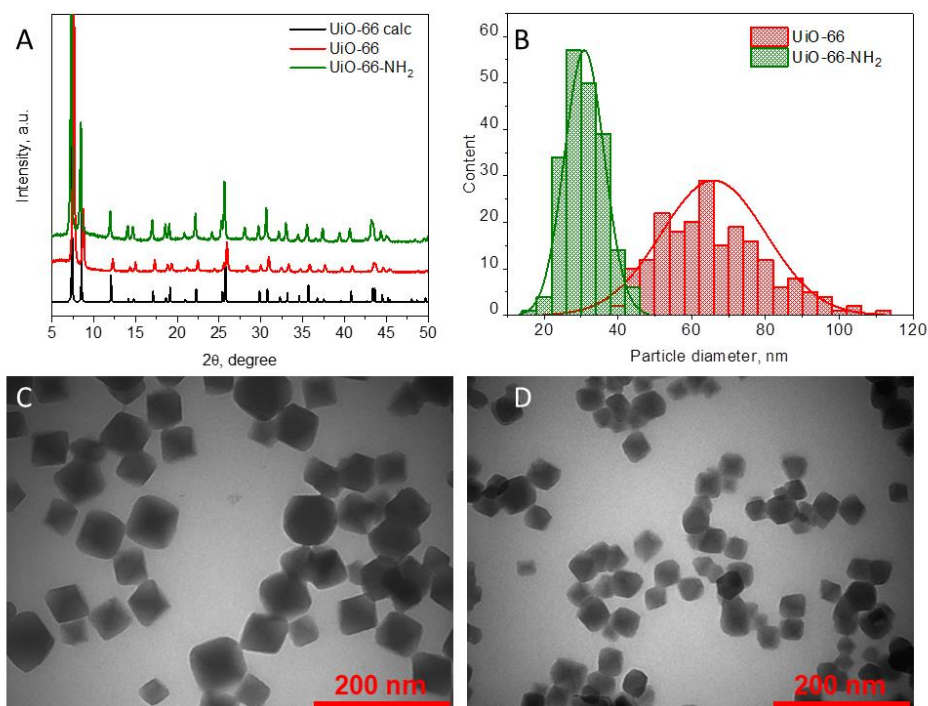

**Figure S1.** Powder XRD patterns of samples UiO-66 and UiO-66 NH<sub>2</sub> (A). Profile UiO-66 calc was calculated according to crystallographic information from 10.1021/cm1022882. Particle-sized distribution according to TEM images from 200 particles (B). Representative TEM images of UiO-66 (C) and UiO-66-NH<sub>2</sub> (D) samples.

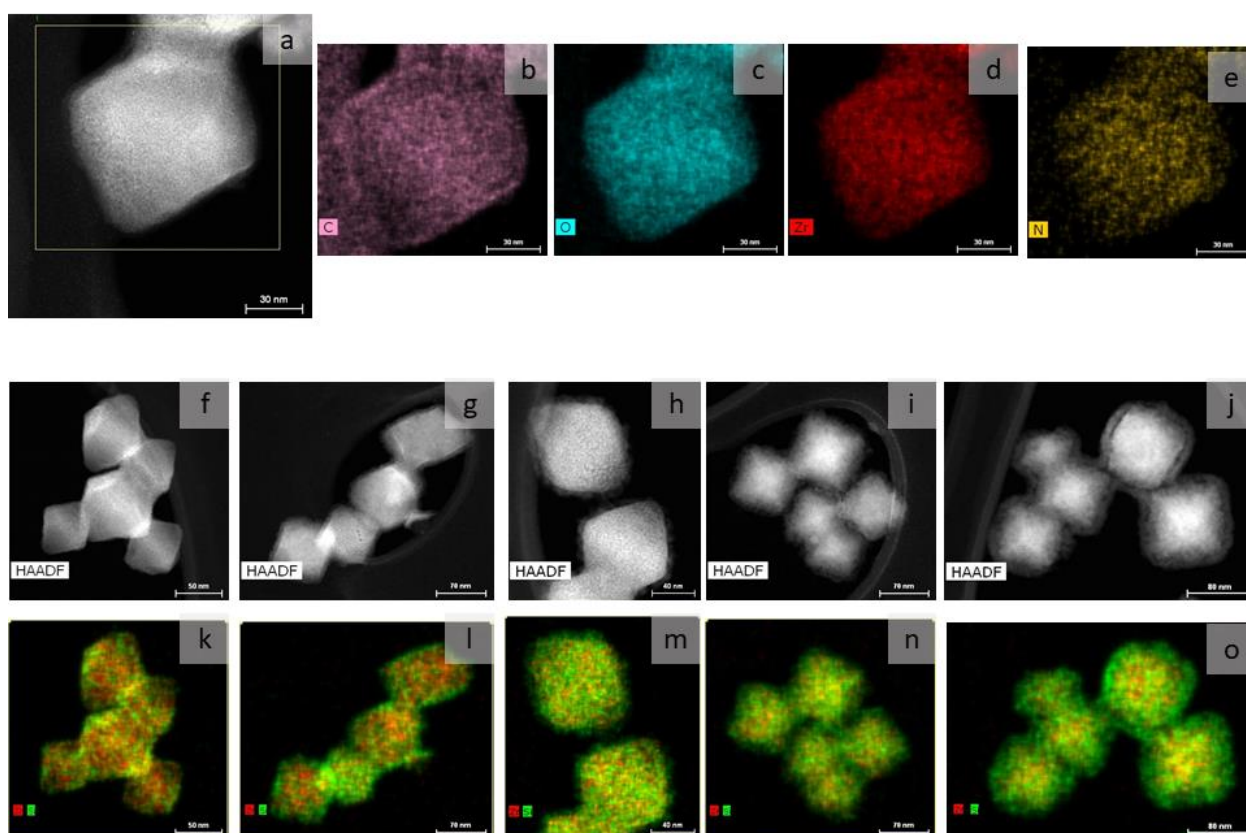

**Figure S2.** TEM images of UiO-66-NH<sub>2</sub> MOFs with maps of C, O, Zr, and N (a-e). HAADF images and corresponding Zr-Si elemental maps for UiO-66-NH<sub>2</sub>@SiO<sub>2</sub> samples obtained by incubation of nanoparticles in TEOS for 0.5h (f, k), 1h (g, l), 2h (h, m), 4h (i, n), 24h (j, o).

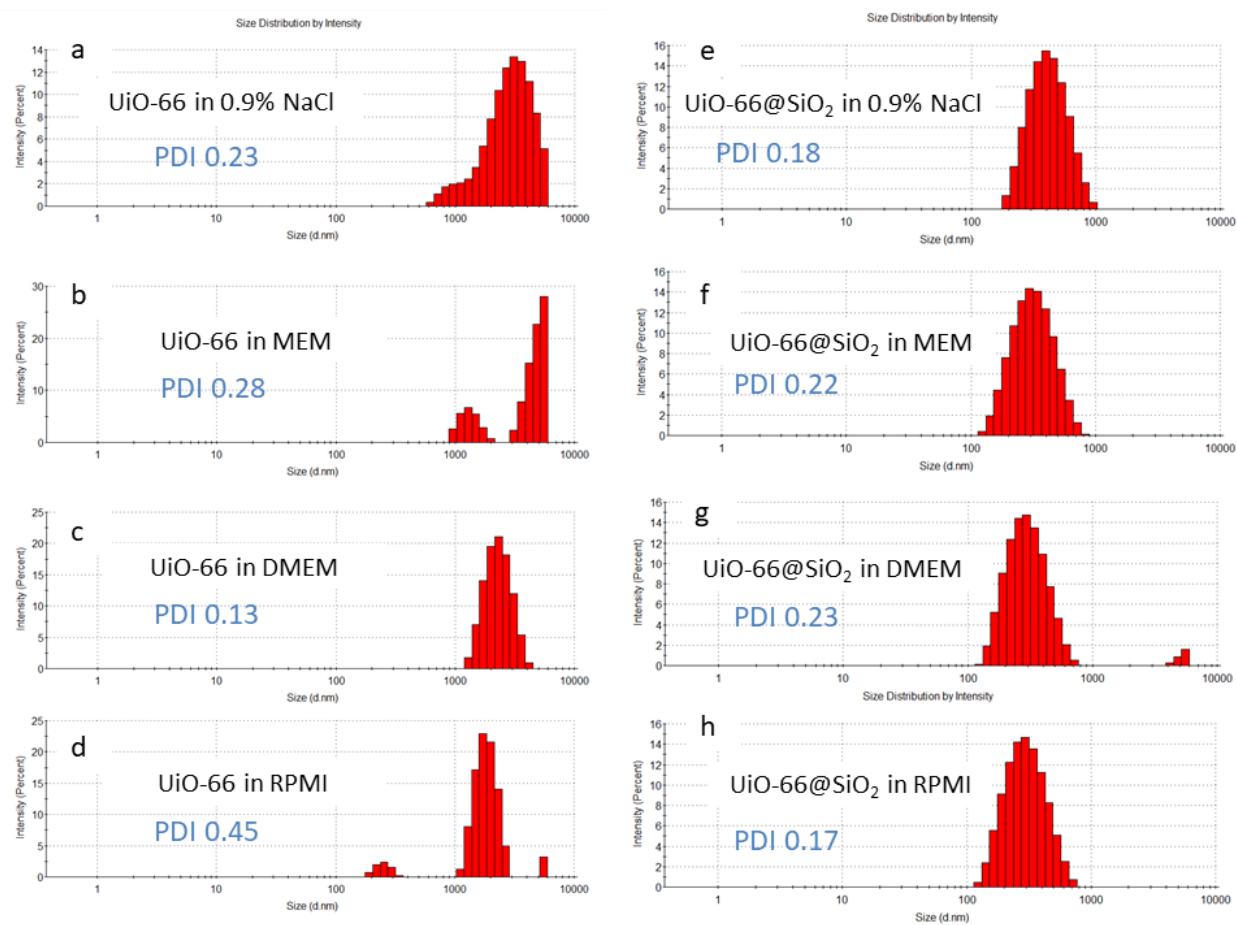

**Figure S3.** DLS-intensity results for UiO-66 and UiO-66@SiO<sub>2</sub> MOFs dispersed in saline solution, MEM, DMEM and RPMI cell culture media.

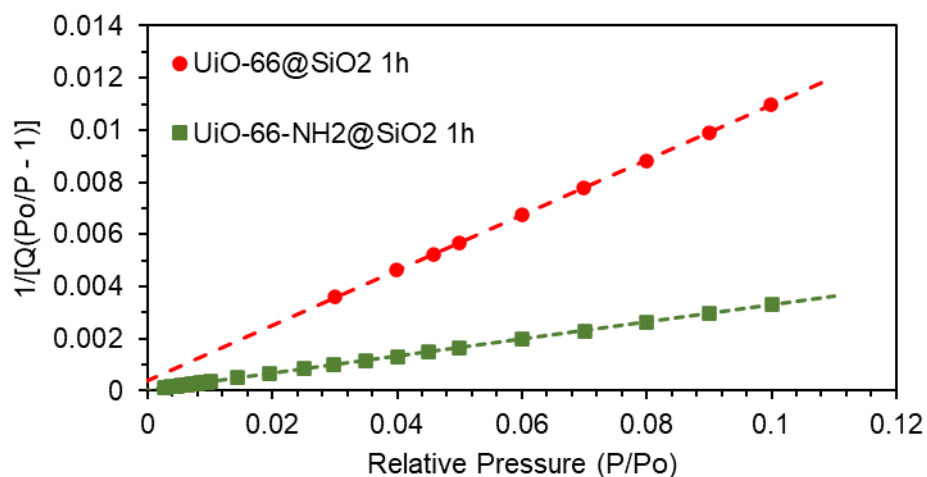

**Figure S4.** BET surface area plots for UiO-66@SiO<sub>2</sub> 1h (red) and UiO-66-NH<sub>2</sub>@SiO<sub>2</sub> 1h (green) samples. Markers represent experimental data; dashed lines show BET approximation.

**Table S1.** Details of porosity calculations. SSA stands for specific surface area, C is the BET constant.

|                                             | BET                    |        |                         | Total pore volume, mm <sup>3</sup> /g | t-plot calculations |                                      |                                   |                         |
|---------------------------------------------|------------------------|--------|-------------------------|---------------------------------------|---------------------|--------------------------------------|-----------------------------------|-------------------------|
|                                             | SSA, m <sup>2</sup> /g | C      | Correlation coefficient |                                       | Thickness equation  | Micropore volume, mm <sup>3</sup> /g | Micropore area, m <sup>2</sup> /g | Correlation coefficient |
| UiO-66@SiO <sub>2</sub> 1h                  | 40.0                   | 457.2  | 0.99969                 | 55.466                                | Harkins and Jura    | 8.996                                | 22.1                              | 0.993088                |
| UiO-66-NH <sub>2</sub> @SiO <sub>2</sub> 1h | 133.3                  | 1414.4 | 0.99996                 | 99.455                                |                     | 38.95                                | 98.3                              | 0.996116                |

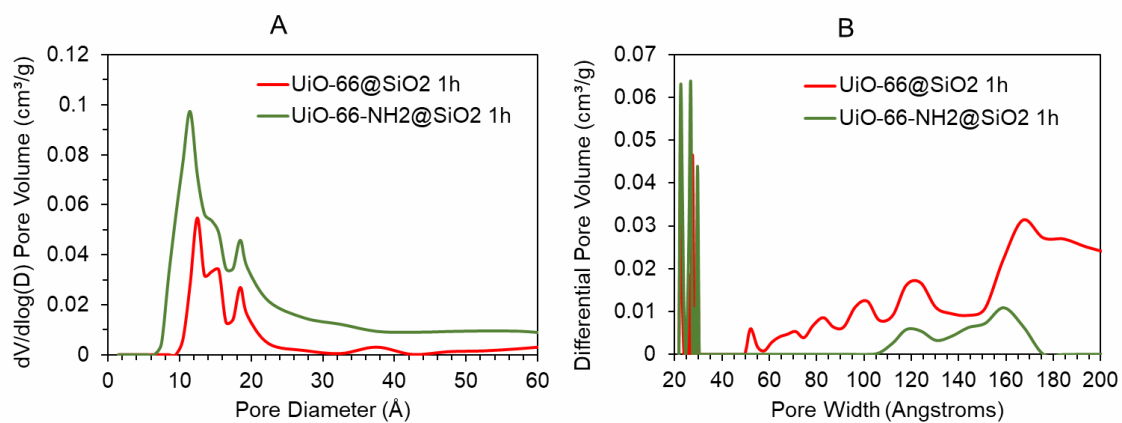

**Figure S5.** (A) BJH pore size distribution according to adsorption branches of isotherms. (B) Pore size distribution by NLDFT according to the model of cylindrical pores in an oxide surface.

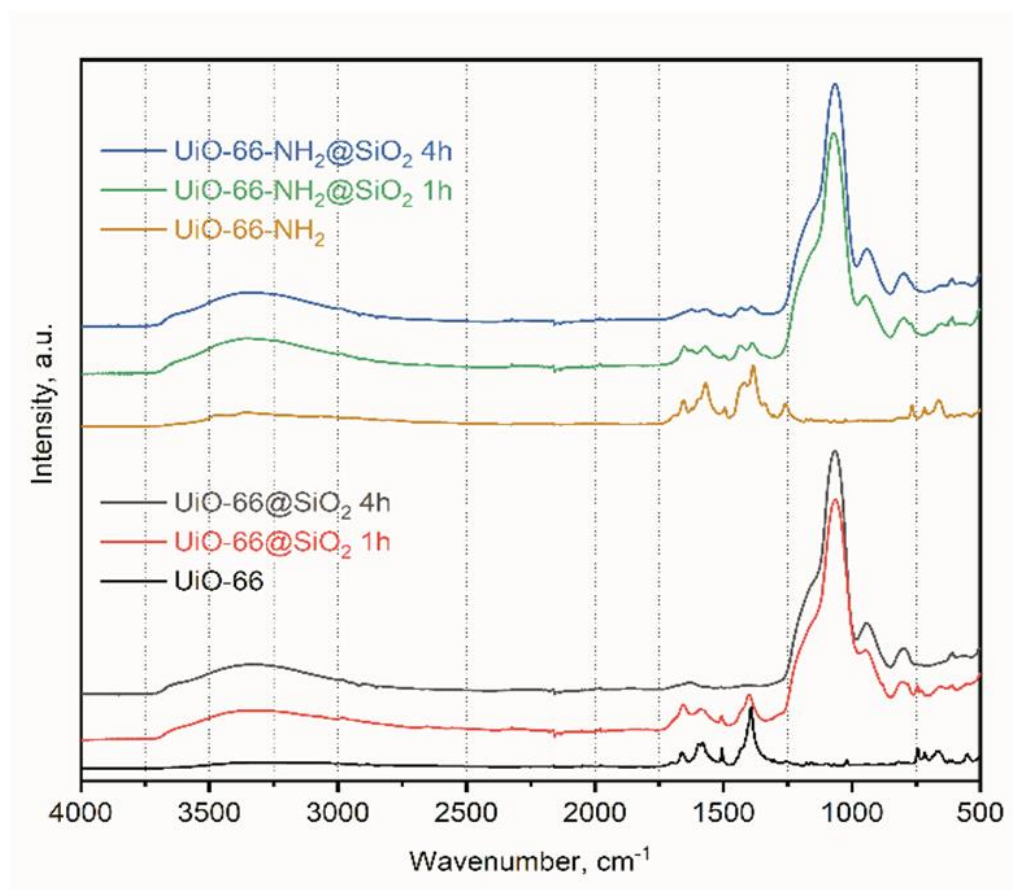

**Figure S6.** ATR-FTIR spectra collected for intact UiO-66 and UiO-66-NH<sub>2</sub> nanoparticles compared to UiO-66@SiO<sub>2</sub> and UiO-66-NH<sub>2</sub>@SiO<sub>2</sub> MOFs treated with TEOS for 1 and 4 h.

PVP grafted UiO-66 in DI water

UiO-66@SiO<sub>2</sub> in DI water

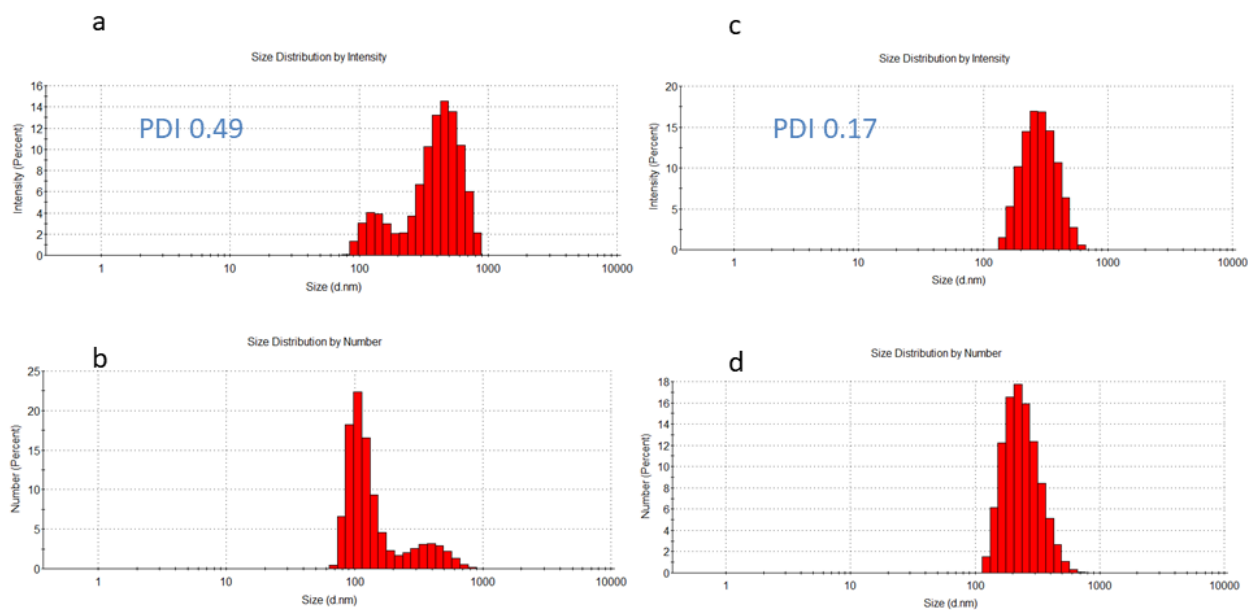

**Figure S7.** DLS-intensity and DLS-number results for PVP grafted UiO-66 and UiO-66@SiO<sub>2</sub> water dispersions.

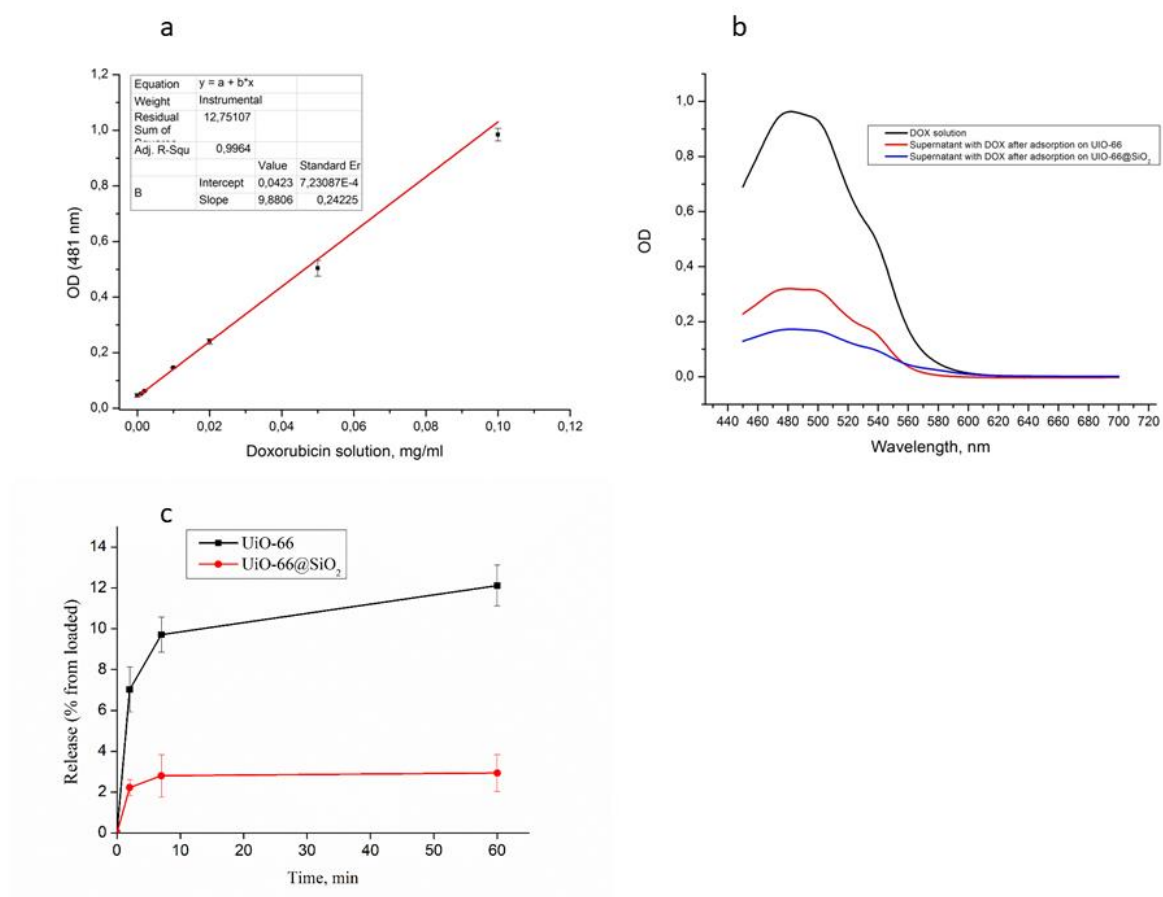

**Figure S8.** Calibration curve for DOX (a) and absorption spectrum of the DOX solution and DOX in supernatants after loading into MOFs (b), DOX release profiles from UiO-66 and UiO-66@SiO<sub>2</sub> (c) .



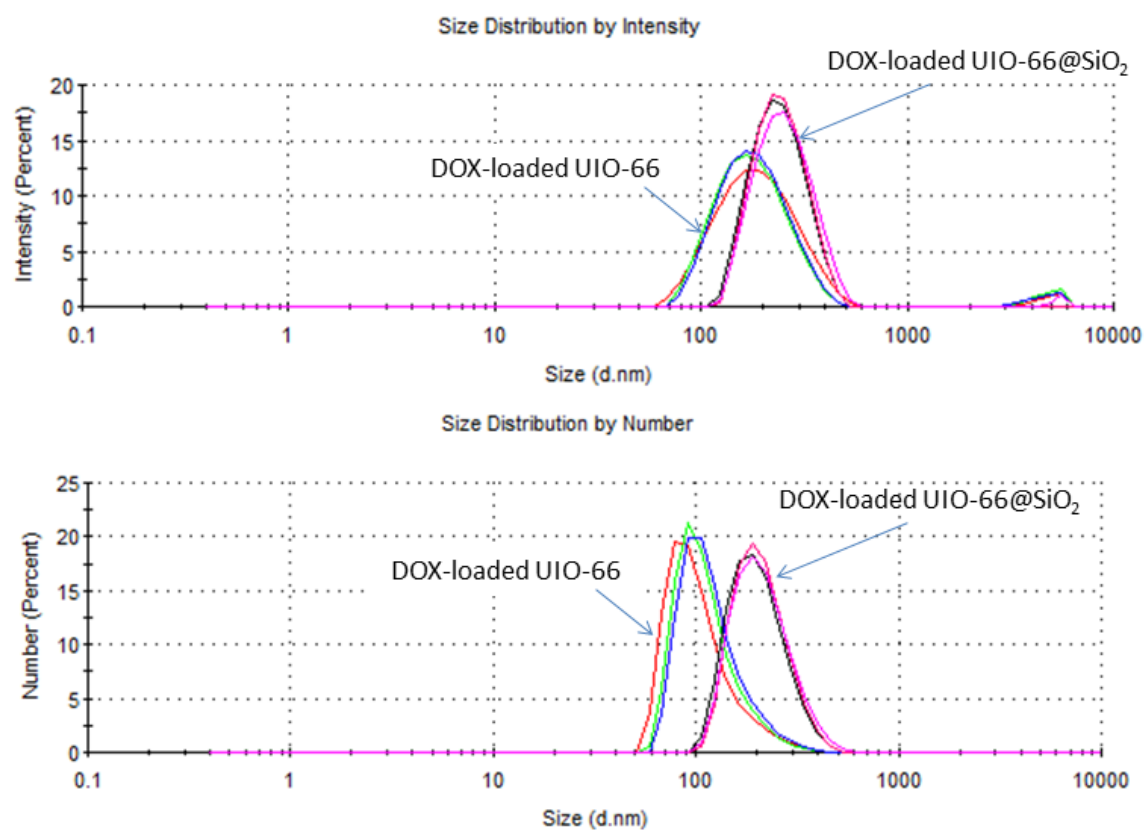

**Figure S9.** DLS-intensity and DLS-number distributions DOX-loaded UIO-66 and UIO-66@SiO<sub>2</sub>.

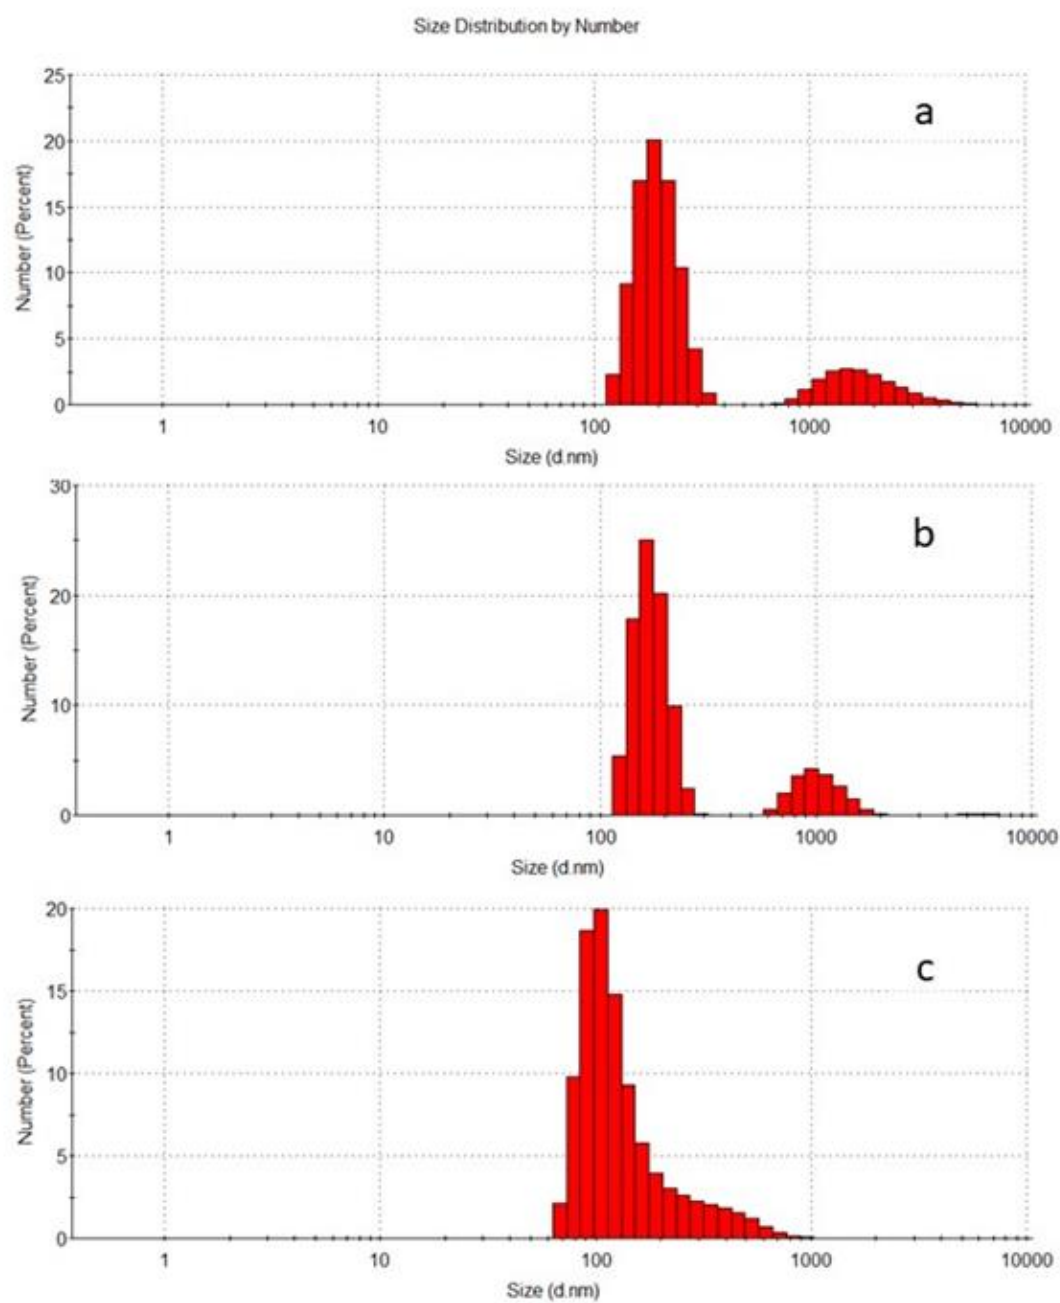

**Figure S10.** DLS-number distributions of DOX-loaded UiO-66/F127-FA in MEM (a), DMEM (b), RPMI (c) cultural media.
